# Supplementary material for: Computing water flow through complex landscapes, part 1:Incorporating depressions in flow routing using FlowFill
Source: Copernicus journal article supplement (doi:10.5194/esurf-2019-11), 2019-03-13
Supplement: Supplementary file 1 [file Runoff_UnfilledCells_Depressions.xlsx]

## Sheet: SangamonRiver
Runoff (m)	Unfilled cells	Unfilled depressions
0	20790	3031
0.001	19204	2081
0.005	15553	1049
0.01	12469	697
0.02	8454	326
0.03	5919	170
0.05	4260	72
0.08	2248	21
0.1	1706	12
0.2	0	0

## Sheet: RioToro
Runoff (m)	Unfilled cells	Unfilled depressions
0	3128	1183
0.001	2922	1025
0.01	2328	563
0.1	1543	70
0.2	1490	34
0.5	1232	14
1	1222	8
2	1221	7
5	164	4
10	157	2
15	0	0
